# Supplementary material
Source: publisher figshare collection journal article supplement (https://frontiersin.figshare.com/ndownloader/files/26060720)
Supplement: Supplementary file [file 26060720]

**Figure S1** Mauve genome alignment of *G. groenlandica* and *G. phototrophica* demonstrating the highly conserved genomic regions housing the photosynthesis gene cluster (PGC).

*Gemmatimonas phototrophica* AP64 (CP011454)

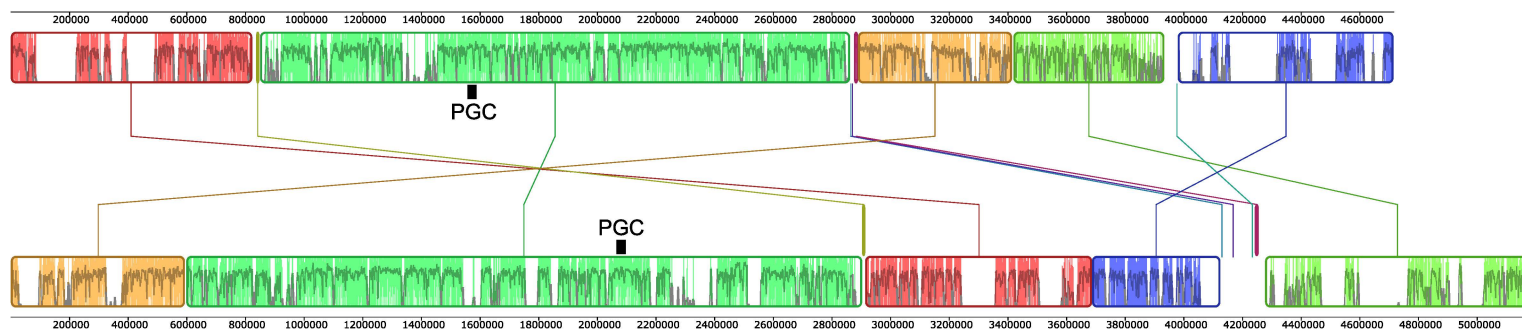

*Gemmatimonas groenlandica* TET16 (CP053085)
